# Supplementary material
Source: HighWire-hosted journal article supplement (https://qualitysafety.bmj.com/content/28/12/997)
Supplement: inline-supplementary-material-1 [file inline-supplementary-material-1.pdf]

**Appendix Table.** Hospitalisations for acute and chronic ACSCs in the practice population in relation to the GP's well-being, job satisfaction and self-assessed work-ability (each well-being indicator examined separately)

| <b>GP well-being indicators</b><br>(most favourable category as referent) | Acute ACSC-H<br>Adjusted * IRR (95% CI) | Chronic ACSC-H<br>Adjusted* IRR (95% CI) |
|---------------------------------------------------------------------------|-----------------------------------------|------------------------------------------|
| <b>Emotional exhaustion</b> (quartiles)                                   |                                         |                                          |
| 1 <sup>st</sup> (low)                                                     | 1.00                                    | 1.00                                     |
| 2 <sup>nd</sup>                                                           | <b>1.16 (1.01-1.34)</b>                 | 0.97 (0.85-1.11)                         |
| 3 <sup>rd</sup>                                                           | <b>1.21 (1.05-1.39)</b>                 | 1.02 (0.86-1.13)                         |
| 4 <sup>th</sup> (high)                                                    | <b>1.27 (1.10-1.46)</b>                 | 1.08 (0.94-1.24)                         |
| <b>Depersonalisation</b> (quartiles)                                      |                                         |                                          |
| 1 <sup>st</sup> (low)                                                     | 1.00                                    | 1.00                                     |
| 2 <sup>nd</sup>                                                           | 1.14 (0.99-1.31)                        | 0.96 (0.84-1.09)                         |
| 3 <sup>rd</sup>                                                           | 1.02 (0.89-1.17)                        | 1.06 (0.92-1.19)                         |
| 4 <sup>th</sup> (high)                                                    | 1.12 (0.98-1.28)                        | 1.13 (0.99-1.30)                         |
| <b>Personal accomplishment</b> (quartiles)                                |                                         |                                          |
| 1 <sup>st</sup> (high)                                                    | 1.00                                    | 1.00                                     |
| 2 <sup>nd</sup>                                                           | 0.99 (0.85-1.15)                        | 1.02 (0.88-1.18)                         |
| 3 <sup>rd</sup>                                                           | 1.04 (0.91-1.19)                        | 1.11 (0.96-1.27)                         |
| 4 <sup>th</sup> (low)                                                     | 1.06 (0.92-1.22)                        | <b>1.25 (1.09-1.44)</b>                  |
| <b>Composite burnout score</b>                                            |                                         |                                          |
| 3-4 (low)                                                                 | 1.00                                    | 1.00                                     |
| 5-6                                                                       | 1.08 (0.91-1.27)                        | 1.06 (0.91-1.24)                         |
| 7-8                                                                       | 1.14 (0.97-1.34)                        | 1.02 (0.89-1.19)                         |
| 9-10                                                                      | <b>1.17 (1.01-1.37)</b>                 | 1.11 (0.95-1.31)                         |
| 11-12 (high)                                                              | <b>1.18 (1.01-1.38)</b>                 | <b>1.20 (1.01-1.43)</b>                  |
| <b>Job satisfaction</b> (quartiles)                                       |                                         |                                          |
| 4 <sup>th</sup> (high)                                                    | 1.00                                    | 1.00                                     |
| 3 <sup>rd</sup>                                                           | 1.10 (0.96-1.26)                        | 1.08 (0.94-1.24)                         |
| 2 <sup>nd</sup>                                                           | <b>1.17 (1.03-1.34)</b>                 | 1.14 (1.00-1.30)                         |
| 1 <sup>st</sup> (low)                                                     | 1.09 (0.95-1.26)                        | <b>1.21 (1.06-1.38)</b>                  |
| <b>Job perceived as unpleasantly stressful</b>                            |                                         |                                          |
| Never/rarely                                                              | 1.00                                    | 1.00                                     |
| Sometimes                                                                 | <b>1.13 (1.02-1.25)</b>                 | 1.02 (0.91-1.13)                         |
| Often/always                                                              | <b>1.20 (1.04-1.39)</b>                 | 1.09 (0.95-1.26)                         |
| <b>Perceived stress</b> (quartiles)                                       |                                         |                                          |
| 1 <sup>st</sup> (low)                                                     | 1.00                                    | 1.00                                     |
| 2 <sup>nd</sup>                                                           | 1.04 (0.91-1.19)                        | 0.87 (0.75-1.00)                         |
| 3 <sup>rd</sup>                                                           | 1.07 (0.93-1.22)                        | 1.02 (0.89-1.17)                         |
| 4 <sup>th</sup> (high)                                                    | 1.15 (1.00-1.32)                        | 0.98 (0.86-1.12)                         |
| <b>General well-being</b>                                                 |                                         |                                          |
| Good                                                                      | 1.00                                    | 1.00                                     |
| Moderate                                                                  | <b>1.23 (1.11-1.36)</b>                 | 1.03 (0.91-1.15)                         |
| Poor                                                                      | <b>1.19 (1.04-1.36)</b>                 | 1.10 (0.95-1.27)                         |
| <b>Self-assessed work-ability</b>                                         |                                         |                                          |
| 4 <sup>th</sup> (high)                                                    | 1.00                                    | 1.00                                     |
| 3 <sup>rd</sup>                                                           | 1.09 (0.94-1.27)                        | 1.07 (0.92-1.24)                         |
| 2 <sup>nd</sup>                                                           | <b>1.18 (1.02-1.38)</b>                 | 1.05 (0.90-1.21)                         |
| 1 <sup>st</sup> (low)                                                     | <b>1.30 (1.10-1.53)</b>                 | <b>1.22 (1.03-1.44)</b>                  |

\*Adjusted for patient age, gender, region, socioeconomic factors and multimorbidity (categorised as presented in Table 1) and for GP seniority, gender, and number of listed patients.

**Bold** indicates significant results ( $p \leq 0.05$ ).
